1 **Silencing *SmDI* in Solanaceae alters susceptibility to root-knot nematodes**

2

3 Joffrey Mejias<sup>1</sup>, Yongpan Chen<sup>1,2</sup>, Nhat-My Truong<sup>1,3</sup>, Karine Mulet<sup>1</sup>, Stéphanie Jaubert-

4 Possamai<sup>1</sup>, Pierre Abad<sup>1</sup>, Bruno Favery<sup>1,\*</sup> and Michaël Quentin<sup>1,\*</sup>

5

6 <sup>1</sup> INRAE, Université Côte d'Azur, CNRS, ISA, F-06903 Sophia Antipolis, France

7 <sup>2</sup> Department of Plant Pathology and Key Laboratory of Pest Monitoring and Green

8 Management of the Ministry of Agriculture, China Agricultural University, 100193 Beijing,

9 China

10 <sup>3</sup> Graduate School of Science and Technology, Kumamoto University, Kumamoto 860-11

11 8555, Japan

12

13 \* Correspondence (Tel 33492386495; [bruno.favery@inrae.fr](mailto:bruno.favery@inrae.fr) or [michael.quentin@inrae.fr](mailto:michael.quentin@inrae.fr)).

14

15 ORCID IDs: 0000-0003-3323-1852 (B.F.); 0000-0002-8030-1203 (M.Q.)

16

17 **Keywords:** *Meloidogyne*, Pathogen, Effector, Susceptibility gene, Nucleolus, Spliceosome,

18 *Solanum lycopersicum*, *Nicotiana benthamiana*

19

20 SHORT TITLE (max 40 cha.) *SmDI*, a susceptibility gene to nematodes

21

22 The author responsible for distributing materials integral to the findings presented in this

23 article is: Michael Quentin [michael.quentin@inrae.fr](mailto:michael.quentin@inrae.fr).

24

25 **Word count:** 5306 words (Introduction, 814; Results, 1376; Discussion, 1528; Experimental  
26 procedures, 1360; Acknowledgements, 228). **Figures:** 6. **Supporting information files:** 6 (2  
27 tables and 4 figures).

28

## 29 **Summary**

30 Root-knot nematodes (RKNs) are among the most damaging pests of agricultural crops.  
31 Indeed, *Meloidogyne* is an extremely polyphagous genus of nematodes that can infect  
32 thousands of plant species. A few genes for resistance (R-genes) to RKNs suitable for use in  
33 crop breeding have been identified, and new virulent strains and species of nematode emerge  
34 rendering these R-genes ineffective. Effective parasitism is dependent on the secretion, by the  
35 RKN, of effectors targeting plant functions, which mediate the reprogramming of root cells  
36 into specialised feeding cells. These cells, the giant cells, are essential for RKN development  
37 and reproduction. The EFFECTOR 18 protein (EFF18) from *M. incognita* interacts with the  
38 spliceosomal protein SmD1 in Arabidopsis, disrupting its function in alternative splicing  
39 regulation and modulating the giant cell transcriptome. We show here that EFF18 is a  
40 conserved RKN-specific effector. We also show here that EFF18 effectors also target SmD1  
41 in *Nicotiana benthamiana* and *Solanum lycopersicum*. The alteration of *SmD1* expression by  
42 virus-induced gene silencing (VIGS) in Solanaceae affects giant cell formation and nematode  
43 development. Thus, *SmD1* is a susceptibility gene and a promising target for the development  
44 of broad resistance, especially in Solanaceae, for the control of *Meloidogyne* spp.

45

## 46 **Introduction**

47 Plant parasitic nematodes are major crop pests causing crop losses of several million dollars  
48 annually, through damage to almost all cultivated plants, and the transmission of plant viruses  
49 (Singh et al., 2013). Root-knot nematodes (RKNs) of the genus *Meloidogyne* are considered  
50 to be the most detrimental of these plant parasites, due to the magnitude of the economic  
51 losses they cause (Jones *et al.*, 2013). RKNs are widespread worldwide and can infect more  
52 than 5,500 different plant species, including many species of major agricultural interest.  
53 About 100 RKN species have been described, and those reproducing asexually by mitotic  
54 parthenogenesis (*M. incognita*, *M. javanica*, *M. arenaria* and *M. enterolobii*) are the most  
55 polyphagous and damaging pests. By contrast, those reproducing sexually or by meiotic  
56 parthenogenesis (*M. hapla*) have a smaller host range (Blok et al., 2008; Castagnone-Sereno,  
57 2006).

58 All RKNs are sedentary endoparasites that induce the formation of specialised feeding  
59 structures and typical root deformations, known as galls or root knots, that deprive the plant of  
60 nutrients (Escobar *et al.*, 2015; Favery *et al.*, 2016). After hatching from eggs, the stage 2  
61 juveniles (J2) of *M. incognita* penetrate the root apex and migrate between plant cells to reach  
62 the plant vascular system (Holbein *et al.*, 2019). Once there, the filiform J2 switch to a  
63 sedentary lifestyle, by selecting five to seven cells of the vascular parenchyma and inducing  
64 their reprogramming into specialised feeding cells, known as giant cells (Escobar *et al.*, 2015;  
65 Favery *et al.*, 2016; Olmo *et al.*, 2020). These hypertrophied and multinucleate cells act as  
66 metabolic sinks close to the xylem and phloem vessels that withdraw water and nutrients from  
67 the sap (Rodiuc *et al.*, 2014). The nematode uses these specific giant cells for feeding for the  
68 rest of its life. After successive moults, the sedentary swollen juveniles develop into an adult  
69 female that lays her egg masses on the root surface, thus completing the cycle. The giant cells  
70 are hypertrophied and multinucleate, harbouring hundreds of nuclei. They are produced by

71 successive nuclear divisions uncoupled from cytokinesis, followed by nuclear  
72 endoreduplication (de Almeida Engler and Gheysen, 2013). RKN induce giant cells and gall  
73 formation by recruiting the developmental pathways of post-embryonic organogenesis and  
74 regeneration to promote transient pluripotency (Olmo *et al.*, 2020).

75 RKNs parasitise plants and induce the redifferentiation of vascular cells into giant cells by  
76 secreting effectors, molecules that recruit/hijack plant functions (Mejias *et al.*, 2019; Toruño  
77 *et al.*, 2016). RKN effectors, particularly those produced by the three oesophageal gland cells  
78 and secreted into the host through a stylet, are involved in the four main functions underlying  
79 parasitism: (i) the degradation and modification of plant cell walls during J2 migration within  
80 the root; (ii) the suppression of host defences; (iii) the reprogramming of plant vascular cells  
81 as giant cells and (vi) the maintenance of these feeding sites (Mitchum *et al.*, 2013; Truong *et*  
82 *al.*, 2015). The profound morphological and metabolic changes associated with giant cell  
83 induction by RKNs and the transcriptional reprogramming occurring during the formation of  
84 these cells require the secretion of effectors targeting key nuclear functions (Hewezi and  
85 Baum, 2013; Quentin *et al.*, 2013). With the exception of plant cell wall-degrading enzymes  
86 (Danchin *et al.*, 2010), very few effectors have been shown to be conserved and functional in  
87 multiple RKN species. For example, 16D10 encodes a conserved secretory peptide conserved  
88 in five RKN species (*M. incognita*, *M. arenaria*, *M. hapla*, *M. javanica*, *M. chitwoodi*) that  
89 stimulates root growth and functions as a ligand for a putative plant transcription factor  
90 (Huang *et al.*, 2006; Dinh, 2015). The silencing of *16D10* by RNA interference methods  
91 confers broad resistance to RKNs (Huang *et al.*, 2006; Dinh, 2015). The chorismate mutases,  
92 MiCM3 (Wang *et al.*, 2018) and MjCM1 (Doyle and Lambert, 2003), and the transthyretin-  
93 like proteins, MjTTL5 (Lin *et al.*, 2016) and MhTTL2 (Gleason *et al.*, 2017), also appear to  
94 be effectors conserved among RKNs. Interestingly, MhTTL2 is expressed in the amphids  
95 (Gleason *et al.*, 2017), whereas MjTTL5 is expressed specifically in the subventral glands,

96 suggesting different roles for these two molecules in parasitism, encoded by the same gene  
97 family (Lin *et al.*, 2016).

98 We recently showed that MiEFF18, a nuclear effector from *M. incognita*, is secreted *in*  
99 *planta*, targets the giant cell nuclei and interacts with the SmD1 protein, a core component of  
100 the spliceosome (Mejias *et al.*, 2020). We show here that MiEFF18 is a specific and  
101 conserved RKN effector and that orthologous genes are specifically expressed in the salivary  
102 glands of RKNs. We also show that MiEFF18 and its orthologue in *M. enterolobii*, MeEFF18,  
103 interact with SmD1 proteins from different plant species. Moreover, virus-induced gene  
104 silencing (VIGS) approaches silencing the SmD1 genes of *N. benthamiana* and *S.*  
105 *lycopersicum* greatly impair RKN infection. These results are consistent with the targeting, by  
106 RKNs, of conserved spliceosomal functions, to drive the development of giant cells,  
107 facilitating parasitism on a large spectrum of host plants.

108

## 109 **Results**

### 110 **EFF18 is a conserved RKN-specific effector targeting plant nucleus**

111 MiEFF18 was first described in the *M. incognita* genome (Mejias *et al.*, 2020; Nguyen *et al.*,  
112 2018; Rutter *et al.*, 2014). Database queries showed that MiEFF18 displayed no sequence  
113 homology or known domains, and that it was absent from nematodes of other genera, such as  
114 cyst nematodes and free-living nematodes. By contrast, EFF18 orthologues were identified in  
115 seven of the eight RKNs for which genome sequences were available: *M. incognita*, *M.*  
116 *javanica*, *M. arenaria* (Blanc-Mathieu *et al.*, 2017), *M. hapla* (Opperman *et al.*, 2008), *M.*  
117 *enterolobii* (syn. *M. mayaguensis*) (Koutsovoulos *et al.*, 2020), *M. floridensis* (Lunt *et al.*,  
118 2014) and *M. luci* (Susič *et al.*, 2020) (Figure 1, Table S1, Figure S1). No EFF18 orthologue  
119 was identified in *M. graminicola* (Somvanshi *et al.*, 2018). Three paralogous copies were  
120 identified, in the *M. incognita*, *M. javanica* and in *M. luci* genomes. Four copies were detected

121 in *M. arenaria* and a single copy was detected in *M. hapla*, *M. floridensis* and *M. enterolobii*.  
122 A sequence alignment and analysis of the RKN EFF18 protein sequences showed that they  
123 were more than 60% identical, between 279 and 316 amino acids (aa) long and that they had  
124 an N-terminal secretion signal peptide (SSP), a low-complexity acidic D/E-rich region and a  
125 C-terminal lysine (K)-rich domain carrying direct repeats (Figure 1a, Figure S2). Only the C-  
126 terminal K-rich domain displayed marked differences between copies.

127 A phylogenetic tree based on an alignment of the 17 RKN EFF18 protein sequences  
128 showed divergences between copies among the same species (Figure 1a). EFF18 proteins  
129 more closely related to MiEFF18a/Minc18636 harboured one monopartite NLS and one  
130 bipartite NLS, whereas other copies are more divergent (*e.g.* MiEFF18b/Minc15401 and  
131 MiEFF18c) and contained only one monopartite NLS (Figure 1a). MiEFF18a fused at its C-  
132 or N-terminus to GFP (green fluorescent protein) and MeEFF18a fused at its N-terminus to  
133 GFP were transiently expressed in *Nicotiana benthamiana* leaf epidermis. For EFF18  
134 constructs, GFP fluorescence was only detected in the nucleus, with a strong GFP signal  
135 accumulating in the nucleolus (Figure 1b). In contrast, GFP alone was detected in the  
136 cytoplasm and the nucleus, but not in the nucleolus (Figure 1b). The EFF18s with bipartite  
137 NLS were 98% to 100% identical to the MiEFF18a protein, whereas those with only  
138 monopartite NLS were only 79 to 89% identical to this protein (Figure 1c). *M. hapla* had the  
139 most divergent genome of the *Meloidogyne* species tested. It was found to have a single copy  
140 of the gene, 63-65% identical to the closest copies and the most divergent copies, which  
141 suggests that the ancestor of RKN species had an EFF18 gene, and providing support for the  
142 role of EFF18 as a conserved effector.

143

144 **RKN EFF18s are specifically expressed in the subventral glands**

145 MiEFF18 have been shown to be more strongly expressed at parasitic stages and to be  
146 expressed specifically in the subventral glands of *M. incognita* J2s (Rutter et al., 2014;  
147 Nguyen et al., 2018; Mejias et al., 2020). We studied the pattern of expression of genes  
148 encoding orthologous sequences of MiEFF18 in two other RKN species, by performing *in situ*  
149 hybridisation (ISH) for the *M. enterolobii* *MeEFF18a* and the *M. arenaria* *MaEFF18a*  
150 sequences. A specific signal was detected in the subventral oesophageal gland cells of pre-J2s  
151 after hybridisation with digoxigenin-labelled *MeEFF18a* and *MaEFF18a* antisense probes  
152 (Figure 2). No signal was detected in pre-J2s with sense negative controls. This finding  
153 suggests that *MaEFF18a* and *MeEFF18a*, may, like *MiEFF18a*, be secreted and play an  
154 important role in nematode parasitism.

155

156 **MiEFF18a and MeEFF18a interact with the SmD1 proteins of *A. thaliana*, *N.***  
157 ***benthamiana* and *S. lycopersicum***

158 We have demonstrated an interaction between MiEFF18 and the nuclear ribonucleoproteins  
159 SmD1s from *S. lycopersicum* and *A. thaliana*, modulating the pattern of alternative splicing  
160 and promoting the formation of giant cells (Mejias et al., 2020). Two genes, *AtSmD1a*  
161 (AT3G07590) and *AtSmD1b* (AT4G02840), encode SmD1 proteins in *Arabidopsis* (Koncz et  
162 al., 2012) and two genes encode 100% identical SmD1 proteins (SlSmD1) in *S. lycopersicum*:  
163 *SlSmD1a* (Soly06g084310) and *SlSmD1b* (Soly09g064660). In *N. benthamiana*, we  
164 identified three genes encoding SmD1s: *NbSmD1a* (*Niben101Scf01782g05006*), *NbSmD1b*  
165 (*Niben101Scf05290g01011*), and *NbSmD1c* (*Niben101Scf04283g03011*). A multiple sequence  
166 alignment showed that SmD1 was highly conserved in these species, with 93% identity  
167 between SlSmD1 and the sequence from which it diverged most strongly, *AtSmD1b* (Figure  
168 3a). Like all Sm proteins, SmD1s carry two conserved Sm motifs mediating protein-protein  
169 interactions during small nuclear ribonucleoprotein (snRNP) biogenesis (Figure 3b). We

170 investigated the subcellular localisation of SmD1 in plant cells, by transiently expressing  
171 constructs encoding GFP-SmD1 fusion proteins in *N. benthamiana*. We confirmed a strong  
172 accumulation of SlSmD1a and AtSmD1b in the nucleolus and in Cajal bodies, and a weaker  
173 accumulation in the nucleoplasm (Figure 3c).

174 We then investigated whether MeEFF18a was also able to interact with SmD1 proteins  
175 from *S. lycopersicum* and *A. thaliana*, like MiEFF18 (Mejias et al., 2020). Using a pairwise  
176 yeast-two hybrid approach, we showed that MiEFF18a and MeEFF18a interact with SmD1  
177 proteins from plants of different clades, such as *A. thaliana*, *S. lycopersicum* and *N.*  
178 *benthamiana* (Figure 3d). As a control, we tested SmD1 interactions with another *M.*  
179 *incognita* effector, MiEFF16, encoded by the *Minc16401* gene and expressed in the  
180 subventral glands, with the same nuclear location *in planta* as MiEFF18 (Mejias et al., 2020).  
181 No interaction was observed between MiEFF16 and SmD1 proteins in yeast (Figure 3d).  
182 These results demonstrate that EFF18 proteins are conserved among RKNs and that they  
183 interact with SmD1 proteins, which are conserved among plant species.

184

### 185 ***SmD1* acts as a susceptibility gene for infection in plants of different clades**

186 We recently demonstrated an important role for the AtSmD1b protein in giant cell formation  
187 and successful nematode infection (Mejias et al., 2020). We investigated whether *SmD1* is a  
188 conserved susceptibility gene required to ensure infection, and essential for RKN parasitism  
189 in Solanaceae species, by using a virus-induced gene silencing (VIGS) approach to alter the  
190 expression of *SmD1* genes in *S. lycopersicum* and *N. benthamiana*.

191 We first performed a VIGS assay to silence *SmD1* genes in *S. lycopersicum* (Figure 4a). We  
192 evaluated silencing efficiency by RT-qPCR on emerging leaves. Treated tomatoes had much  
193 lower levels of *SmD1* transcripts (Figure 4b). Tomatoes in which SmD1 genes were silenced  
194 displayed developmental defects on emerging leaves and had a shorter root system (Figure  
195 S3). In tomato plants infected with *M. incognita*, in which *SmD1* genes were silenced, the



196 number of females producing egg masses was much smaller than that in control plants treated  
197 with the TRV-GFP virus (Figure 4c).

198 Because of adverse effect of *SmDI* silencing on development in tomato, we then silenced  
199 the *SmDI* genes in *N. benthamiana*, which allows performing a VIGS assay at a later  
200 developmental stage when roots have already developed substantially (Figure 5a and 5b). An  
201 evaluation of silencing efficiency by RT-qPCR showed that *N. benthamiana* roots subjected  
202 to VIGS had much lower levels of *SmDI* transcripts, particularly for the most strongly  
203 expressed gene, *NbSmDIb* (Figure 5c). We observed no significant decrease in the expression  
204 of the two mostly weakly expressed genes, *NbSmDIa* and *NbSmDIc* (Figure 5c; Figure S4).  
205 *N. benthamiana* plants in which *SmDI* was silenced produced a much smaller number of galls  
206 (up to 80% fewer) following infection with *M. incognita* (Figure 5d).

207 We studied the effect on nematode and giant cell development in detail, by investigating  
208 J2s *in planta* by the fuchsine acid staining method, to determine the proportions of migrating  
209 filiform and sedentary swollen parasitic juveniles and their ratio. The percentage of migrating  
210 filiform J2s was higher (90%) in plants in which *SmDI* was silenced, which had a lower  
211 percentage of swollen juveniles, indicating a defect in the RKN development (Figure 6a). We  
212 also investigated whether the giant cells formed on plants in which *SmDI* was silenced  
213 displayed developmental defects. We observed these cells directly, under a confocal  
214 microscope, after clearing in benzyl alcohol/benzyl benzoate (BABB ; Cabrera et al., 2018). A  
215 comparison of the mean surface areas of the largest giant cells in each gall showed that giant  
216 cells from plants in which *SmDI* was silenced were 36% smaller than those from control  
217 plants (Figure 6b and 6c). These results confirm the important role of *SmDI* in giant cell  
218 formation in Solanaceae species and the requirement of this protein for successful nematode  
219 development.

220

## 221 **Discussion**

222 The ability of plant pathogens to infect their hosts is generally dependent on the secretion of  
223 effectors. Most pathogens secrete effectors to overcome host physical defences, such as the  
224 plant cell wall, and to suppress plant immune responses (Toruño *et al.*, 2016). Other effectors  
225 are more specific to the parasitic strategy of the pathogen and may regulate host gene  
226 expression or trigger changes in host cell morphology and physiology to allow pathogen  
227 feeding and development. Most obligatory biotrophs form specific feeding structures, such as  
228 the haustoria of biotrophic filamentous pathogens, and produce sets of specific effectors  
229 (Chaudhari *et al.*, 2014; O’Connell and Panstruga, 2006). RKNs are root endoparasites that  
230 manipulate host cells to form specialised giant cells for feeding. These giant cells constitute  
231 the sole source of nutrients for the nematode, and are, therefore, essential for nematode  
232 survival. RKNs induce giant cells by manipulating root cell developmental programmes.  
233 Indeed, massive transcriptomic reprogramming occurs during giant cell formation (Favery *et*  
234 *al.*, 2016; Mitchum *et al.*, 2013). Genes associated with root meristem function, lateral root  
235 formation and the establishment of the vasculature, in particular, are tightly regulated upon  
236 giant cell induction (Cabrera *et al.*, 2014; Olmo *et al.*, 2020; Yamaguchi *et al.*, 2017).  
237 Alternative splicing has recently been shown to occur in *Arabidopsis* following infection with  
238 *M. incognita*, and this process contributes to transcriptome and proteome diversity (Mejias *et*  
239 *al.*, 2020).

240

## 241 **EFF18 is a nuclear conserved RKN-specific effector**

242 Nuclear effectors are thought to mediate the transcriptional reprogramming required for giant  
243 cell formation (Mejias *et al.*, 2019; Quentin *et al.*, 2013). They may interfere with the function  
244 of transcription factors, as described for Mi16D10, which interacts with SCARECROW-like  
245 transcription factors (Huang *et al.*, 2006), or may themselves act as transcription factors, as

246 reported for Mi7H08 (Zhang *et al.*, 2015). MiEFF18 is another RKN effector that has been  
247 shown to be secreted within host cells, in which it localises to the nucleus. MiEFF18 has been  
248 shown to interact with the SmD1 protein, a core component of the spliceosome conserved in  
249 all eukaryotes, thereby modulating alternative splicing and gene expression (Mejias *et al.*,  
250 2020). MiEFF18 may corrupt the function of *Arabidopsis SmD1* function to modulate the  
251 expression of various genes encoding proteins involved in giant cell formation through  
252 processes such as DNA replication or cytokinesis (Mejias *et al.*, 2020). We show here that the  
253 manipulation of SmD1 function by MiEFF18 plays a key role in giant cell development in  
254 other plant species, such as *Nicotiana benthamiana* and the tomato *Solanum lycopersicum*.

255 Genes encoding the MiEFF18 effector were found in all available *Meloidogyne* spp.  
256 genomes other than the draft genome for the rice RKN *M. graminicola* (Somvanshi *et al.*,  
257 2018). EFF18 is exclusive to RKN, being absent from all other parasitic nematodes and other  
258 plant pathogens with parasitic strategies not involving the induction of giant feeding cells. At  
259 least one orthologous copy of a MiEFF18 sequence was detected in each of the available  
260 *Meloidogyne* genomes, demonstrating that MiEFF18 is a conserved effector. The multiple  
261 copies identified in *M. incognita*, *M. javanica* and *M. arenaria* are consistent with the  
262 polyploidy of these mitotic parthenogenetic species (Koutsovoulos *et al.*, 2020). The absence  
263 of an EFF18 effector in *M. graminicola* may be explained by the particular host range and life  
264 cycle of this nematode. *M. graminicola* may have lost the EFF18 effector during  
265 specialisation on monocotyledonous hosts and adaptation to the infection of submerged roots  
266 (Mantelin *et al.*, 2017). These growing conditions may have resulted in different requirements  
267 for the modulation of gene expression for giant cell ontogenesis, dependent on effectors other  
268 than EFF18.

269 The distribution of EFF18 orthologues in two major groups, with copies (e.g. MiEFF18a)  
270 carrying two NLS, and those of the most divergent group (e.g. MiEFF18b) carrying only one

271 NLS, suggested a possible duplication of the ancestral MiEFF18 gene in the ancestor of RKN  
272 species, with one of the duplicated genes either gaining or losing a bipartite NLS. The  
273 proteins from the closest group to the MiEFF18a gene would be expected to function  
274 similarly to MiEFF18a, through the modulation of SmD1 functions, due to the very high level  
275 of sequence identity between these proteins (98% identity). *M. enterolobii* is an extremely  
276 polyphagous species that reproduces through mitotic parthenogenesis, like *M. incognita*.  
277 Therefore, we investigated the functionality of proteins MeEFF18 orthologue. We found that,  
278 like MiEFF18, MeEFF18a was able to interact with SmD1 proteins from *A. thaliana*, *N.*  
279 *benthamiana* and *S. lycopersicum*, suggesting that orthologous copies of MiEFF18a are  
280 functional and target the same functions in different host plants. MiEFF18a and MeEFF18a  
281 are the first examples of conserved RKN effectors able to target the same conserved plant  
282 process in different plant species.

283

#### 284 **Targeting conserved effectors to engineer plant resistance**

285 The identification of conserved effectors could lead to new strategies for developing broad  
286 resistance (Huang *et al.*, 2006; Landry *et al.*, 2020; Peeters *et al.*, 2013; Roux *et al.*, 2015).  
287 Only a few RKN effectors have been described to be conserved. The MAP ( *Meloidogyne*  
288 avirulence protein) effector family, which includes *M. incognita* Mi-MAP1.2, was shown to  
289 be conserved in 13 of the 21 RKN species tested, and absent from other genera of plant-  
290 parasitic nematodes (PPNs) (Tomalova *et al.*, 2012). The genes of the MAP effector family  
291 harbour one or multiple CLE-like motifs, which may be involved in feeding site formation, as  
292 demonstrated for cyst nematode CLE-like peptides, which promote syncytium formation  
293 (Rutter *et al.*, 2014; Mitchum *et al.*, 2012). MjNULG1a, from *M. javanica*, is a nuclear  
294 effector with a demonstrated role in parasitism. Southern blot experiments have revealed the  
295 presence of MjNULG1a orthologues in *M. incognita* and *M. enterolobii*, but not in other

296 PPNs (Lin *et al.*, 2013). Similarly, the 16D10 effector is exclusive to RKNs (Huang *et al.*,  
297 2006; Dinh, 2015). The use of host-induced gene silencing (HIGS) approaches to engineer  
298 plant resistance to RKNs has excited considerable interest (Ali *et al.*, 2017; Banerjee *et al.*,  
299 2017). The targeting of genes involved in nematode development or encoding effectors has  
300 been considered. Silencing conserved effectors may allow specific resistance to RKNs with  
301 no impact on non-targeted species. Studies of Mi16D10 have demonstrated the feasibility of  
302 conferring RKN resistance in *Arabidopsis*, potato or grape through the targeting of this  
303 effector (Huang *et al.*, 2006; Yang *et al.*, 2013; Dinh, 2015). However, this strategy is  
304 constrained both by limited HIGS effectiveness, by the redundancy of the effector's function  
305 and the difficulty in targeting the point in time when the effector plays a key role in the  
306 interaction.

307

### 308 **Targeting essential conserved effector targets to induce a loss of susceptibility**

309 The use of resistant cultivars or rootstocks is an efficient and non-polluting method for  
310 controlling RKNs. Very few natural resistance genes (R-genes) have been identified to date,  
311 in a limited number of plant species. Furthermore, some RKN species or populations are not  
312 controlled by these genes, e.g. *M. enterolobii* (Elling, 2013; Kiewnick *et al.*, 2009) or can  
313 overcome these resistances, e.g. populations of *M. incognita* virulent against tomato *Mi1.2*  
314 (Castagnone-Sereno, 2006). One alternative would be to target conserved plant genes  
315 encoding proteins involved in host processes that are hijacked by the biotrophic pathogens for  
316 settlement and feeding, and that are essential for disease development. These susceptibility  
317 genes (S-genes) represent an alternative to R-genes for the deployment of pathogen resistance,  
318 and they may be more durable in the field (Dong and Ronald, 2019; Engelhardt *et al.*, 2018;  
319 van Schie and Takken, 2014). Well-characterised examples of S-genes include the genes  
320 encoding eukaryotic translation initiation factors, the sugar transporter SWEET14 or PMR6,

321 which are required for viral, bacterial and oomycete infections, respectively (Langner *et al.*,  
322 2018; van Schie and Takken, 2014; Schmitt-Keichinger, 2019).

323 In recent decades, transcriptomic approaches have been widely used to identify genes  
324 regulated upon RKN infection, and, thus, host functions manipulated by RKNs. However, as  
325 thousands of genes are differentially regulated during a compatible interaction, the  
326 identification of S-genes from these data is a very time-consuming process, probably  
327 explaining why only a few genes to date have been shown to be important for the  
328 establishment of giant cells (Favery *et al.*, 2016). Interactomics approaches have recently been  
329 used to identify the direct plant targets manipulated by PPN effectors. Only a few targets of  
330 RKN effectors have been identified, but most have been shown to be instrumental in  
331 promoting nematode parasitism (Mejias *et al.*, 2019). SmD1 is a host target of an effector  
332 required for host susceptibility to RKNs in several plant clades. It exerts a conserved plant  
333 function targeted by a core effector in *Arabidopsis* and Solanaceae, common to diverse  
334 *Meloidogyne* species that have adopted the same successful parasitic strategy based on the  
335 induction of giant feeding cells in the root in several host species. SmD1 is thus a good  
336 candidate S-gene for targeting in the engineering of crop resistance to RKN. As SmD1  
337 functions is required for plant development knockout mutations of this gene have adverse  
338 effects, it will be necessary to identify mutant alleles that can evade recognition by MiEFF18  
339 whilst remaining competent to perform the functions of SmD1 in the regulation of plant  
340 development in a continually changing environment. This strategy has proven to be effective  
341 for potyvirus susceptibility *eIF4E* genes (Bastet *et al.*, 2019).

342

## 343 **Experimental procedures**

### 344 **Nematode and plant materials**

345 *M. incognita* (Morelos strain), *M. arenaria* (Guadeloupe strain) and *M. enterolobii* (Godet  
346 strain) were multiplied on tomato (*Solanum lycopersicum* cv. “Saint Pierre”) growing in a  
347 growth chamber (25°C, 16 h photoperiod). Freshly hatched J2s were collected as previously  
348 described (Caillaud and Favery, 2016). For VIGS experiments, *Nicotiana benthamiana* and  
349 *Solanum lycopersicum* (cv M82) seeds were sown on soil and incubated at 4°C for two days.  
350 After germination, *N. benthamiana* and tomato plantlets were transplanted into pots  
351 containing soil and sand (1:1), and were grown at 24°C and 16°C, respectively (photoperiod,  
352 16 h: 8 h, light: dark).

353

#### 354 **Sequence analysis, alignment and phylogenetic tree**

355 The sequences of EFF18 paralogues and orthologues were obtained from *Meloidogyne*  
356 genomic resources [http://www6.inra.fr/meloidogyne\\_incognita](http://www6.inra.fr/meloidogyne_incognita) and Wormbase parasite.  
357 Protein sequences were aligned with the MAFFT tool on the EBI server  
358 (<https://www.ebi.ac.uk/Tools/msa/mafft/>). The alignment was then used as input for the  
359 IQTree Web server <http://iqtree.cibiv.univie.ac.at/> (Trifinopoulos et al., 2016) to generate the  
360 maximum likelihood phylogenetic tree. The model chosen by the inbuilt model test was  
361 HIVb+F+G4. Support for the nodes was calculated with 100 bootstrap replicates. *M. hapla*  
362 was used as the outgroup in the phylogenetic tree for MiEFF18 orthologues. The tree was  
363 visualised in iTOL <https://itol.embl.de/>. The sequence alignment were coloured with  
364 Boxshade ([https://embnet.vital-it.ch/software/BOX\\_form.html](https://embnet.vital-it.ch/software/BOX_form.html)). The pairwise sequence  
365 identity matrix of RKN EFF18 protein sequences was generated with Sequence Demarcation  
366 Tool version 1.2 software (Muhire *et al.*, 2014) (<http://web.cbio.uct.ac.za/~brejnev/>).

367

#### 368 ***In situ* hybridisation (ISH)**

369 ISH was performed on freshly hatched *M. arenaria* and *M. enterolobii* pre-J2s, as previously  
370 described (Jaouannet *et al.*, 2018). The MaEFF18, and MeEFF18 gene fragments were

371 amplified with specific primers (Table S2). A sense probe for MeEFF18 was used as a  
372 negative control. Images were obtained with a microscope (Zeiss Axioplan2, Germany).

373

#### 374 **Pairwise yeast two-hybrid assays**

375 For pairwise yeast two-hybrid (Y2H) assays, the coding sequences (CDS) of the MiEFF16,  
376 MiEFF18 and MeEFF18 effectors without their secretion signals were amplified (Table S1)  
377 and inserted into pB27 as C-terminal fusions with LexA. Full-length SmD1 CDS sequences  
378 (*SlSmD1*, *NbSmD1* and *AtSmD1b*) were amplified (Table S1) and inserted into pP6 as C-  
379 terminal fusions with Gal4-AD. The pB27 and pP6 constructs were verified by sequencing  
380 and used to transform the L40 $\Delta$ Gal4 (MAT $\alpha$ ) and Y187 (MAT $\alpha$ ) yeast strains, respectively.  
381 Y187 and L40 $\Delta$ Gal4 were crossed and diploids were selected on medium lacking tryptophan  
382 and leucine. Interactions were investigated on medium lacking tryptophan, leucine and  
383 histidine and supplemented with 0.5 mM 3-aminotriazole (3-AT).

384

#### 385 ***N. benthamiana* agroinfiltration**

386 Transient expression was achieved by infiltrating *N. benthamiana* leaves with *A. tumefaciens*  
387 GV3101 strains harbouring GFP-fusions, as previously described (Caillaud *et al.*, 2008).  
388 Leaves were imaged 48 hours after agroinfiltration, with an inverted confocal microscope  
389 equipped with an argon ion and HeNe laser as the excitation source. For simultaneous GFP  
390 imaging, samples were excited at 488 nm and GFP emission was detected selectively with a  
391 505-530 nm band-pass emission filter.

392

#### 393 **Virus-induced gene silencing in Solanaceae**

394 VIGS assays were performed on *N. benthamiana* and *S. lycopersicum*. We used the Sol  
395 Genomics Network VIGS-Tool (<https://vigs.solgenomics.net/>) to design the best sequence for



396 silencing *SlSmD1a* transcripts, and selected the full-length *SlSmD1a* (without the ATG and  
397 STOP codons) for amplification by PCR with the TRV2-*SlSmD1*-F/TRV2-*SlSmD1*-R primer  
398 pairs (Table S2). The PCR products were digested with *EcoRI* and *XhoI* and ligated to the  
399 tobacco rattle virus RNA 2 vector (TRV2) for the transformation of *A. tumefaciens* strain  
400 GV3101. VIGS assays were performed, as previously described, by the co-infiltration of  
401 leaves of three-week-old *N. benthamiana* plants (Lange *et al.*, 2013; Velasquez *et al.*, 2009)  
402 or 10-days-old tomato plants (Cox *et al.*, 2019) with agrobacterial strains containing the RNA  
403 1 vector (TRV1) and TRV2. Tomato plants were incubated at 16°C for four weeks. Three  
404 independent biological replicates were established for each set of conditions ( $n = 15$  per  
405 replicate). Two *N. benthamiana* root systems per set of conditions and per replicate, or *S.*  
406 *lycopersicum* leaves were collected upon RKN infection and frozen in liquid nitrogen for  
407 subsequent RNA extraction and the assessment of silencing efficiency by RT-qPCR.

408

#### 409 **RKN infection assay, juveniles in the plant and giant cell area measurements**

410 *N. benthamiana* plants subjected to VIGS were inoculated with 200 *M. incognita* J2s per  
411 plant, 10 days post inoculation (dpi) with TRV, and incubated at 24°C. *S. lycopersicum* plants  
412 subjected to VIGS were inoculated with 150 *M. incognita* J2s per plant, 30 dpi with TRV, and  
413 incubated at 16°C for two weeks before transfer to 24°C. *N. benthamiana* infected roots were  
414 collected two weeks after infection whereas *S. lycopersicum* infected roots were collected six  
415 weeks after infection. Galls, and egg masses stained with 4.5% eosin were counted under a  
416 binocular microscope, and root system was weighted ( $n=12$  to 19 and  $n=18$  to 21 plants per  
417 replicates for *N. benthamiana* and *S. lycopersicum*, respectively). Three and two independent  
418 biological replicates were established for each set of conditions in *N. benthamiana* and *S.*  
419 *lycopersicum*, respectively. The impact of the plant lines on the number of galls per mg of  
420 root in *N. benthamiana* and the number of egg masses per plant in *S. lycopersicum* were

421 analyzed using Kruskal Wallis test since the dependent variable did not follow a Normal  
422 distribution using a Shapiro-Wilk Test. The different replicates of the numbers of galls per mg  
423 of roots in *N. benthamiana* were pooled for the analyzes because there was no difference  
424 between the replications ( $X^2_2= 2.8$ ,  $P = 0.248$ ). By contrast, the different replicates of the  
425 number of egg masses per plant in *S. lycopersicum* varied depending on the replication ( $X^2_1=$   
426  $5.3$ ,  $P = 0.022$ ), and they were analyzed separately. Thus, both the number of galls per mg of  
427 root in *N. benthamiana* and the number of egg masses per plant in *S. lycopersicum* varied  
428 significantly between the two plant lines tested ( $X^2_1= 57.2$ ,  $P < 0.001$ ;  $X^2_1 > 25.6$ ,  $P < 0.001$ ,  
429 respectively). For determination of the ratio of filiform-to-swollen nematodes, infected roots  
430 were collected 14 dpi, parasitic nematodes were stained with fuchsine acid, as previously  
431 described (Karssen and Moens, 1983), and nematodes were examined under a binocular  
432 microscope (model LSM 880; Zeiss) ( $n= 3$  plants per replicate for TRV-empty lines and  $n = 5$   
433 plants per replicate for TRV-SmD1 lines, with a mean of 75 nematodes observed per  
434 condition and per replicate). Three independent biological replicates were established for each  
435 set of conditions. Statistical analyses were carried out with R software (R Development Core  
436 Team, version 3.1.3). For giant cell area measurements, galls were cleared in BABB, as  
437 previously described (Cabrera *et al.*, 2018), and examined under an inverted confocal  
438 microscope (model LSM 880; Zeiss). The mean areas of the biggest giant cell in each gall  
439 from *N. benthamiana*, for each genotype, were measured with Zeiss ZEN software ( $n = 32$   
440 and 26 galls for control and SmD1-VIGSed plants, respectively). One biological experiment  
441 was performed for giant cells measurement. The data were analysed with a *t*-test since the  
442 data followed a normal distribution ( $t = 3.5$ ,  $P < 0.001$ ).

443

444 **Reverse transcription-quantitative PCR**

445 We assessed silencing efficiency in Solanaceae species, by extracting total RNA with TriZol  
446 (Invitrogen) and subjecting 1 µg of total RNA to reverse transcription with the Superscript IV  
447 reverse transcriptase (Invitrogen). qPCR analyses were performed as described by Nguyen et  
448 al., 2016. Primers were designed to amplify both SlSmD1 transcripts or to discriminate  
449 between the three copies of SmD1 present in *N. benthamiana* specifically according to their  
450 UTR, to prevent the amplification of TRV2-SlSmD1 constructs (Table S2). We performed  
451 RT-qPCR in triplicate on cDNA samples from three independent biological replicates. The  
452 *EF-1α* and Actin genes were used for the normalisation of RT-qPCR data (Liu *et al.*, 2012).  
453 Quantifications and statistical analyses were performed with SATqPCR (Rancurel *et al.*,  
454 2019), and the results are expressed as normalised absolute quantities.

455

#### 456 **Graphs and statistical analysis**

457 Graphs and plots were created with Microsoft® Office Excel® 2016 and statistical  
458 calculations were performed in R.

459

#### 460 **Accession numbers**

461 The sequence data from this article can be found in the *Arabidopsis* Information Resource  
462 (<https://www.arabidopsis.org/>), Solgenomics (<https://solgenomics.net/>) and/or  
463 GenBank/EMBL databases. All RKN EFF18 protein sequences are presented in the Figure S1  
464 The accession numbers are summarised in Table S1 including MiEFF18a (KX907770),  
465 MeEFF18a (MW272456), NbSmD1a (MT683762), NbSmD1b (MT683763) and NbSmD1c  
466 (MT683764).

467

#### 468 **Acknowledgements**

469 We thank Dr Johnathan Dalzell and Steven Dyer (Queen's University Belfast, UK) for tomato  
470 VIGS protocol and vectors, Pr S.P. Dinesh-Kumar (University of California, Davis, USA) for  
471 VIGS vectors and Hybrigenics Services (Paris, France) for providing the pB27 and pP6  
472 vectors and the L40 $\Delta$ Gal4 and Y187 yeast strains. We thank Dr Nemo Peeters and Dr Laurent  
473 Deslandes (LIPM, Castanet Tolosan, France) and Gregori Bonnet (Syngenta seeds) for helpful  
474 discussions. Microscopy work was performed at the SPIBOC imaging facility of Institut  
475 Sophia Agrobiotech. We thank Dr Lucie S. Monticelli for providing the statistical analyses.  
476 We thank Dr Olivier Pierre and the whole platform team for their help with microscopy. This  
477 work was funded by the INRAE SPE department and the French Government (National  
478 Research Agency, ANR) through the 'Investments for the Future' LabEx SIGNALIFE:  
479 programme reference #ANR-11-LABX-0028-01, by the INRA-Syngenta Targetome project,  
480 by the French-Japanese bilateral collaboration programmes PHC SAKURA 2016 #35891VD  
481 and 2019 #43006VJ and by the French-Chinese bilateral collaboration program PHC XU  
482 GUANGQI 2020 #45478PF. J.M. holds a doctoral fellowship from the French *Ministère de*  
483 *l'Enseignement Supérieur, de la Recherche et de l'Innovation* (MENRT grant). N.M.T. was  
484 supported by a USTH fellowship, as part of the 911-USTH programme of the Ministry of  
485 Education and Training of The Socialist Republic of Vietnam. Y.P.C. obtained scholarships  
486 from the China Scholarship Council (No. 201806350108) for studies at INRAE, France.

487

#### 488 **Conflict of interest**

489 The authors have no conflict of interest to declare.

490

#### 491 **Author contributions**

492 J.M. designed and performed experiments, and interpreted data; J.M., YC and N.M.T.  
493 generated constructs and performed yeast two-hybrid analysis; YC performed *in situ*

494 hybridisation and *in planta* subcellular localisation experiments; KM performed VIGS in  
495 tomato and nematode infection tests; J.M., P.A., S.J.P., B.F. and M.Q. wrote the manuscript;  
496 B.F. and M.Q. obtained funding, designed the work and supervised the experiments and data  
497 analyses; all the authors read and edited the manuscript.

498

## 499 **References**

500

501 Ali, M.A., Azeem, F., Abbas, A., Joyia, F.A., Li, H., and Dababat, A.A. (2017) Transgenic  
502 Strategies for Enhancement of Nematode Resistance in Plants. *Frontiers in Plant*  
503 *Science*, **8**, 1–13.

504 de Almeida Engler, J. and Gheysen, G. (2013) Nematode-induced endoreduplication in plant  
505 host cells: why and how? *Molecular Plant-Microbe Interactions*, **26**, 17–24.

506 Banerjee, S., Banerjee, A., Gill, S.S., Gupta, O.P., Dahuja, A., Jain, P.K., and Sirohi, A.  
507 (2017) RNA Interference: A Novel Source of Resistance to Combat Plant Parasitic  
508 Nematodes. *Frontiers in Plant Science*, **8**:834, doi: 10.3389/fpls.2017.00834.

509 Bastet, A., Zafirov, D., Giovinazzo, N., Guyon-Debast, A., Nogué, F., Robaglia, C., and  
510 Gallois, J.L. (2019) Mimicking natural polymorphism in eIF4E by CRISPR-Cas9 base  
511 editing is associated with resistance to potyviruses. *Plant Biotechnology Journal*, **17**,  
512 1736–1750.

513 Blanc-Mathieu, R., Perfus-Barbeoch, L., Aury, J.-M.M., Da Rocha, M., Gouzy, J., Sallet, E.,  
514 et al. (2017) Hybridization and polyploidy enable genomic plasticity without sex in the  
515 most devastating plant-parasitic nematodes. *PLoS Genetics*, **13**, e1006777.

516 Blok, V.C., Jones, J.T., Phillips, M.S., and Trudgill, D.L. (2008) Parasitism genes and host  
517 range disparities in biotrophic nematodes: The conundrum of polyphagy versus  
518 specialisation. *Bioessays*, **30**, 249–259.

519 Cabrera, J., Bustos, R., Favery, B., Fenoll, C., and Escobar, C. (2014) NEMATIC: a simple

- 520 and versatile tool for the in silico analysis of plant-nematode interactions. *Molecular*  
521 *Plant Pathology*, **15**, 627–636.
- 522 Cabrera, J., Olmo, R., Ruiz-Ferrer, V., Abreu, I., Hermans, C., Martinez-Argudo, I., et al.  
523 (2018) A Phenotyping Method of Giant Cells from Root-Knot Nematode Feeding Sites  
524 by Confocal Microscopy Highlights a Role for CHITINASE-LIKE 1 in Arabidopsis.  
525 *International Journal of Molecular Sciences*, **19**, 429.
- 526 Caillaud, M.-C., Abad, P., and Favery, B. (2008) Cytoskeleton reorganization. *Plant*  
527 *Signaling & Behavior*, **3**, 816–818.
- 528 Caillaud, M.-C.C. and Favery, B. (2016) In Vivo Imaging of Microtubule Organization in  
529 Dividing Giant Cell. In: *Methods in Molecular Biology* (Caillaud, M.-C., ed) , pp. 137–  
530 144. New York: Springer New York.
- 531 Castagnone-Sereno, P. (2006) Genetic variability and adaptive evolution in parthenogenetic  
532 root-knot nematodes. *Heredity*, **96**, 282–289.
- 533 Chaudhari, P., Ahmed, B., Joly, D.L., and Germain, H. (2014) Effector biology during  
534 biotrophic invasion of plant cells. *Virulence*, **5**, 703–709.
- 535 Cox, D.E., Dyer, S., Weir, R., Cheseto, X., Sturrock, M., Coyne, D., et al. (2019) ABC  
536 transporter genes ABC-C6 and ABC-G33 alter plant-microbe-parasite interactions in the  
537 rhizosphere. *Scientific Reports*, **9**, 19899.
- 538 Danchin, E.G.J., Rosso, M.-N.N., Vieira, P., de Almeida-Engler, J., Coutinho, P.M.,  
539 Henrissat, B., and Abad, P. (2010) Multiple lateral gene transfers and duplications have  
540 promoted plant parasitism ability in nematodes. *Proc Natl Acad Sci U S A*, **107**, 17651–  
541 17656.
- 542 Dong, O.X. and Ronald, P.C. (2019) Genetic Engineering for Disease Resistance in Plants:  
543 Recent Progress and Future Perspectives. *Plant Physiology*, **180**, 26–38.
- 544 Doyle, E.A. and Lambert, K.N. (2003) *Meloidogyne javanica* chorismate mutase 1 alters plant

- 545 cell development. *Mol Plant Microbe Interact*, **16**, 123–131.
- 546 Elling, A. a (2013) Major emerging problems with minor meloidogyne species.  
547 *Phytopathology*, **103**, 1092–1102.
- 548 Engelhardt, S., Stam, R., and Hückelhoven, R. (2018) Good Riddance? Breaking Disease  
549 Susceptibility in the Era of New Breeding Technologies. *Agronomy*, **8**, 114.
- 550 Escobar, C., Barcala, M., Cabrera, J., and Fenoll, C. (2015) Overview of Root-Knot  
551 Nematodes and Giant Cells. In: *Advances in Botanical Research* , pp. 1–32.
- 552 Favery, B., Quentin, M., Jaubert-Possamai, S., and Abad, P. (2016) Gall-forming root-knot  
553 nematodes hijack key plant cellular functions to induce multinucleate and hypertrophied  
554 feeding cells. *Journal of Insect Physiology*, **84**, 60–69.
- 555 Gleason, C., Polzin, F., Habash, S.S., Zhang, L., Utermark, J., Grundler, F.M.W., and  
556 Elashry, A. (2017) Identification of two Meloidogyne hapla genes and an investigation  
557 of their roles in the plant-nematode interaction. *Molecular Plant-Microbe Interactions*,  
558 **30**, 101–112
- 559 Hewezi, T. and Baum, T.J. (2013) Manipulation of Plant Cells by Cyst and Root-Knot  
560 Nematode Effectors. *Molecular Plant-Microbe Interactions*, **26**, 9–16.
- 561 Holbein, J., Franke, R.B., Marhavý, P., Fujita, S., Górecka, M., Sobczak, M., et al. (2019)  
562 Root endodermal barrier system contributes to defence against plant - parasitic cyst and  
563 root - knot nematodes. *The Plant Journal*, **100**, 221–236.
- 564 Huang, G.Z., Allen, R., Davis, E.L., Baum, T.J., and Hussey, R.S. (2006) Engineering broad  
565 root-knot resistance in transgenic plants by RNAi silencing of a conserved and essential  
566 root-knot nematode parasitism gene. *Proceedings of the National Academy of Sciences of  
567 the United States of America*, **103**, 14302–14306.
- 568 Jaouannet, M., Nguyen, C.-N., Quentin, M., Jaubert-Possamai, S., Rosso, M.-N., and Favery,  
569 B. (2018) In situ Hybridization (ISH) in Preparasitic and Parasitic Stages of the Plant-

- 570 parasitic Nematode *Meloidogyne* spp. *Bio-Protocol*, **8**, 1–13.
- 571 Jones, J.T., Haegeman, A., Danchin, E.G.J.J., Gaur, H.S., Helder, J., Jones, M.G.K.K., et al.  
572 (2013) Top 10 plant-parasitic nematodes in molecular plant pathology. *Molecular Plant*  
573 *Pathology*, **14**, 946–961.
- 574 Karszen, G. and Moens, M. (1983) Root-knot nematodes. In: *Plant nematology* , pp. 59–90.  
575 Wallingford: CABI.
- 576 Kiewnick, S., Dessimoz, M., and Franck, L. (2009) Effects of the Mi-1 and the N root-knot  
577 nematode-resistance gene on infection and reproduction of *Meloidogyne enterolobii* on  
578 tomato and pepper cultivars. *Journal of nematology*, **41**, 134–9.
- 579 Koutsovoulos, G.D., Pouillet, M., Elashry, A., Kozłowski, D.K.L., Sallet, E., Da Rocha, M., et  
580 al. (2020) Genome assembly and annotation of *Meloidogyne enterolobii*, an emerging  
581 parthenogenetic root-knot nematode. *Scientific Data*, **7**, 324.
- 582 Landry, D., González - Fuente, M., Deslandes, L., and Peeters, N. (2020) The large, diverse,  
583 and robust arsenal of *Ralstonia solanacearum* type III effectors and their in planta  
584 functions. *Molecular Plant Pathology*, **21**, 1377–1388.
- 585 Lange, M., Yellina, A.L., Orashakova, S., and Becker, A. (2013) Virus-Induced Gene  
586 Silencing (VIGS) in Plants: An Overview of Target Species and the Virus-Derived  
587 Vector Systems. In: *Methods in Molecular Biology* , pp. 1–14. Humana Press Inc.
- 588 Langner, T., Kamoun, S., and Belhaj, K. (2018) CRISPR Crops: Plant Genome Editing  
589 Toward Disease Resistance. *Annual Review of Phytopathology*, **56**, 479–512.
- 590 Lin, B., Zhuo, K., Chen, S., Hu, L., Sun, L., Wang, X., et al. (2016) A novel nematode  
591 effector suppresses plant immunity by activating host reactive oxygen species-  
592 scavenging system. *New Phytologist*, **209**, 1159–1173.
- 593 Lin, B., Zhuo, K., Wu, P., Cui, R., Zhang, L.-H., and Liao, J. (2013) A novel effector protein,  
594 MJ-NULG1a, targeted to giant cell nuclei plays a role in *Meloidogyne javanica*



- 595 parasitism. *Molecular plant-microbe interactions*, **26**, 55–66.
- 596 Liu, D., Shi, L., Han, C., Yu, J., Li, D., and Zhang, Y. (2012) Validation of Reference Genes  
597 for Gene Expression Studies in Virus-Infected *Nicotiana benthamiana* Using  
598 Quantitative Real-Time PCR. *PLoS ONE*, **7**, e46451.
- 599 Lunt, D.H., Kumar, S., Koutsovoulos, G., and Blaxter, M.L. (2014) The complex hybrid  
600 origins of the root knot nematodes revealed through comparative genomics. *PeerJ*, **2**,  
601 e356.
- 602 Mantelin, S., Bellafiore, S., and Kyndt, T. (2017) *Meloidogyne graminicola*: a major threat  
603 to rice agriculture. *Molecular Plant Pathology*, **18**, 3–15.
- 604 Mejias, J., Bazin, J., Truong, N., Chen, Y., Marteu, N., Bouteiller, N., et al. (2020) The  
605 root - knot nematode effector MiEFF18 interacts with the plant core spliceosomal  
606 protein SmD1 required for giant cell formation. *New Phytologist*, **in press**, doi:  
607 10.1111/nph.17089.
- 608 Mejias, J., Truong, N.M., Abad, P., Favery, B., and Quentin, M. (2019) Plant Proteins and  
609 Processes Targeted by Parasitic Nematode Effectors. *Frontiers in Plant Science*, **10**, 970.
- 610 Mitchum, M.G., Hussey, R.S., Baum, T.J., Wang, X., Elling, A.A., Wubben, M., and Davis,  
611 E.L. (2013) Nematode effector proteins: an emerging paradigm of parasitism. *New*  
612 *Phytologist*, **199**, 879–894.
- 613 Mitchum, M.G., Wang, X., Wang, J., and Davis, E.L. (2012) Role of Nematode Peptides and  
614 Other Small Molecules in Plant Parasitism. *Annual Review of Phytopathology*, **50**, 175–  
615 195.
- 616 Muhire, B.M., Varsani, A., and Martin, D.P. (2014) SDT: A Virus Classification Tool Based  
617 on Pairwise Sequence Alignment and Identity Calculation. *PLoS ONE*, **9**, e108277.
- 618 Nguyen, C.-N., Perfus-Barbeoch, L., Quentin, M., Zhao, J., Magliano, M., Marteu, N., et al.  
619 (2018) A root-knot nematode small glycine and cysteine-rich secreted effector,

- 620 MiSGCR1, is involved in plant parasitism. *New Phytologist*, **217**, 687–699.
- 621 O’Connell, R.J. and Panstruga, R. (2006) Tete a tete inside a plant cell: establishing  
622 compatibility between plants and biotrophic fungi and oomycetes. *New Phytologist*, **171**,  
623 699–718.
- 624 Olmo, R., Cabrera, J., Díaz-Manzano, F.E., Ruiz-Ferrer, V., Barcala, M., Ishida, T., et al.  
625 (2020) Root - knot nematodes induce gall formation by recruiting developmental  
626 pathways of post - embryonic organogenesis and regeneration to promote transient  
627 pluripotency. *New Phytologist*, **227**, 200–215.
- 628 Opperman, C.H., Bird, D.M., Williamson, V.M., Rokhsar, D.S., Burke, M., Cohn, J., et al.  
629 (2008) Sequence and genetic map of *Meloidogyne hapla*: A compact nematode genome  
630 for plant parasitism. *Proc Natl Acad Sci U S A*, **105**, 14802–14807.
- 631 P. T. Y. Dinh (2015) Plant-nematode interactions and the application of RNA interference for  
632 controlling root-knot nematodes. *PhD*, **3**, 54–67.
- 633 Peeters, N., Carrère, S., Anisimova, M., Plener, L., Cazalé, A.-C., and Genin, S. (2013)  
634 Repertoire, unified nomenclature and evolution of the Type III effector gene set in the  
635 *Ralstonia solanacearum* species complex. *BMC Genomics*, **14**, 859.
- 636 Quentin, M., Abad, P., and Favery, B. (2013) Plant parasitic nematode effectors target host  
637 defense and nuclear functions to establish feeding cells. *Frontiers in Plant Science*, **4**, 53.
- 638 Rancurel, C., van Tran, T., Elie, C., and Hilliou, F. (2019) SATQPCR: Website for statistical  
639 analysis of real-time quantitative PCR data. *Molecular and Cellular Probes*, **46**, 101418.
- 640 Rodiuc, N., Vieira, P., Banora, M.Y., and de Almeida Engler, J. (2014) On the track of  
641 transfer cell formation by specialized plant-parasitic nematodes. *Frontiers in Plant*  
642 *Science*, **5**, 1–14.
- 643 Roux, B., Bolot, S., Guy, E., Denancé, N., Lautier, M., Jardinaud, M.-F., et al. (2015)  
644 Genomics and transcriptomics of *Xanthomonas campestris* species challenge the concept

- 645 of core type III effectome. *BMC Genomics*, **16**, 975.
- 646 Rutter, W.B., Hewezi, T., Abubucker, S., Maier, T.R., Huang, G., Mitreva, M., et al. (2014)
- 647 Mining Novel Effector Proteins from the Esophageal Gland Cells of *Meloidogyne*
- 648 *incognita*. *Molecular plant-microbe interactions*, **27**, 965–974.
- 649 van Schie, C.C.N. and Takken, F.L.W. (2014) Susceptibility Genes 101: How to Be a Good
- 650 Host. *Annual Review of Phytopathology*, **52**, 551–581.
- 651 Schmitt-Keichinger, C. (2019) Manipulating Cellular Factors to Combat Viruses: A Case
- 652 Study From the Plant Eukaryotic Translation Initiation Factors eIF4. *Frontiers in*
- 653 *Microbiology*, **10**:17. doi: 10.3389/fmicb.2019.00017
- 654 Singh, S.K., Hodda, M., and Ash, G.J. (2013) Plant-parasitic nematodes of potential
- 655 phytosanitary importance, their main hosts and reported yield losses. *EPPO Bulletin*, **43**,
- 656 334–374.
- 657 Somvanshi, V.S., Tathode, M., Shukla, R.N., and Rao, U. (2018) Nematode Genome
- 658 Announcement: A Draft Genome for Rice Root-Knot Nematode, *Meloidogyne*
- 659 *graminicola*. *Journal of Nematology*, **50**, 111–116.
- 660 Susič, N., Koutsovoulos, G.D., Riccio, C., Danchin, E.G.J., Blaxter, M.L., Lunt, D.H., et al.
- 661 (2020) Genome sequence of the root-knot nematode *Meloidogyne luci*. *Journal of*
- 662 *Nematology*, **52**, e2020-25.
- 663 Tomalova, I., Iachia, C., Mulet, K., and Castagnone-Sereno, P. (2012) The map-1 gene family
- 664 in root-knot nematodes, *Meloidogyne* spp.: a set of taxonomically restricted genes
- 665 specific to clonal species. *PloS one*, **7**, e38656.
- 666 Toruño, T.Y., Stergiopoulos, I., and Coaker, G. (2016) Plant-Pathogen Effectors: Cellular
- 667 Probes Interfering with Plant Defenses in Spatial and Temporal Manners. *Annual Review*
- 668 *of Phytopathology*, **54**, 419–441.
- 669 Truong, N.M., Nguyen, C.-N., Abad, P., Quentin, M., and Favery, B. (2015) Function of

- 670 Root-Knot Nematode Effectors and Their Targets in Plant Parasitism. In: *Elsevier*  
671 (Escobar,C. and Fenoll,C., eds) , pp. 293–324. Academic Press.
- 672 Velasquez, A., Chakravarthy, S., and Martin, G.B. (2009) Virus-induced Gene Silencing  
673 (VIGS) in *Nicotiana benthamiana* and Tomato. *Journal of Visualized Experiments*, 28:  
674 1292. doi: 10.3791/1292.
- 675 Wang, X., Xue, B., Dai, J., Qin, X., Liu, L., Chi, Y., et al. (2018) A novel Meloidogyne  
676 incognita chorismate mutase effector suppresses plant immunity by manipulating the  
677 salicylic acid pathway and functions mainly during the early stages of nematode  
678 parasitism. *Plant Pathology*, **67**, 1436–1448.
- 679 Yamaguchi, Y.L., Suzuki, R., Cabrera, J., Nakagami, S., Sagara, T., Ejima, C., et al. (2017)  
680 Root-Knot and Cyst Nematodes Activate Procambium-Associated Genes in Arabidopsis  
681 Roots. *Frontiers in Plant Science*, **8**, 1195.
- 682 Yang, Y., Jittayasothorn, Y., Chronis, D., Wang, X., Cousins, P., and Zhong, G.-Y. (2013)  
683 Molecular characteristics and efficacy of 16D10 siRNAs in inhibiting root-knot  
684 nematode infection in transgenic grape hairy roots. *PloS one*, **8**, e69463.
- 685 Zhang, L., Davies, L.J., and Elling, A. a (2015) A Meloidogyne incognita effector is imported  
686 into the nucleus and exhibits transcriptional activation activity in planta. *Molecular Plant*  
687 *Pathology*, **16**, 48–60.

688

## 689 **Figure legends**

690

691 **Figure 1** Effector 18 (EFF18) is a conserved effector in root-knot nematodes. (a)  
692 Phylogenetic tree and schematic diagram of root-knot nematode EFF18 protein sequences.  
693 The tree scale corresponds to the number of substitutions per site based on the amino-acid  
694 matrix (JTT). In the schematic diagram of EFF18 proteins, the predicted secretion signal

695 peptide (SP; grey boxes), the aspartic acid and glutamic acid (D-E)-rich region (red boxes),  
696 the lysine (K)-rich C-terminal region (blue boxes) and the nuclear mono- (purple boxes) or  
697 bi- (orange boxes) partite localisation signals (NLS) are shown. EFF18 proteins from the  
698 closest group to MiEFF18a carry one mono- and one bipartite NLS, whereas the most  
699 divergent copies have only a single monopartite NLS. (b) MiEFF18 localised to the nucleus  
700 and nucleolus of plant cells. The MiEFF18 sequence was fused to that encoding GFP in an N-  
701 or C-terminal position and expressed in *N. benthamiana* leaves by agroinfiltration. GFP was  
702 used as a control and gave fluorescence in the cytoplasm and the nucleus (n), but not the  
703 nucleolus (arrowhead). Bars = 10  $\mu$ m. (c) Pairwise sequence identity matrix for RKN EFF18  
704 protein sequences.

705

706 **Figure 2** RKN EFF18s are specifically expressed in the subventral glands. *In situ*  
707 hybridisation, showing EFF18 transcripts in the subventral glands of J2s of *M. incognita*, *M.*  
708 *enterolobii* and *M. arenaria*, respectively. A sense probe for the MeEFF18 transcript was used  
709 as a negative control. SvG, subventral glands. Bar = 50  $\mu$ m.

710

711 **Figure 3** Conserved SmD1 proteins are targeted by EFF18. (a) MAFFT protein sequence  
712 alignment of the *S. lycopersicum* (Sl), *N. benthamiana* (Nb) and *A. thaliana* (At) SmD1  
713 proteins. (b) Schematic representation of Sm1 and Sm2 motif in SmD1 proteins. (c) GFP-  
714 AtSmD1b and GFP-SlSmD1a accumulate in the nucleus and particularly in the nucleolus  
715 when transiently expressed in *N. benthamiana* epidermal leaf cells. GFP was used as a  
716 nucleocytoplasmic control. n= nucleoplasm; Black arrows show nucleolus. Bars = 5  $\mu$ m. (d)  
717 Pairwise yeast two-hybrid assays showed that the MiEFF18 and MeEFF18 proteins were able  
718 to interact with the SmD1 proteins of *A. thaliana*, *S. lycopersicum* and *N. benthamiana*. We  
719 used MiEFF18 and MiEFF16 as a positive and negative control, respectively. Diploid yeasts  
720 containing the bait and prey plasmids carrying controls, effectors or SmD1 were serially

721 diluted and spotted on plates. The 10<sup>-2</sup> dilution is shown. SD-WL corresponds to the non-  
722 selective medium without tryptophan (W) and leucine (L). Only yeasts carrying a protein-  
723 protein interaction can survive on the SD-WLH (H, histidine) + 0.5 mM 3-aminotriazole (3-  
724 AT) selective medium.

725

726 **Figure 4** The silencing of *SmD1* genes by VIGS affects susceptibility to *M. incognita* in *S.*  
727 *lycopersicum*. (a) Timeline used for the VIGS experiments in *S. lycopersicum*. (b) RT-qPCR  
728 demonstrating the effective silencing of *SlSmD1* in TRV-*SlSmD1* line when compared to the  
729 control TRV-GFP. RPN7 was used for data normalisation. (c) Infection test on tomato plants  
730 in which *SmD1* was silenced (TRV-*SlSmD1*) and control tomato plants (TRV-GFP). Females  
731 producing egg masses were counted seven weeks after inoculation with 150 *M. incognita* J2s  
732 per plant. Statistical significance was determined on the basis of three independent biological  
733 replicates, by Kruskal-Wallis tests. Clearly significant differences were observed between  
734 TRV-GFP control and TRV-*SmD1* plants (\* $p \leq 0.05$ ).

735

736 **Figure 5** The silencing of *SmD1* genes by VIGS affects susceptibility to *M. incognita* in *N.*  
737 *benthamiana*. (a) Timeline used for VIGS experiment in *N. benthamiana*. (b) *N. benthamiana*  
738 plants with silenced *SmD1* genes (TRV-*SmD1*, right panel) and TRV2-empty control plants  
739 (TRV-empty, left panel), showing some developmental defects of the leaves (upper panel)  
740 and a shorter root system (lower panel). Red arrow point-out galls on these pictures. (c) RT-  
741 qPCR showing that the *NbSmD1b* gene, the most strongly expressed and closest orthologue  
742 to the *SlSmD1* gene, was effectively silenced. The data shown are the means of three  
743 independent biological replicates. EF1a and actin were used for data normalisation. (d)  
744 Infection test on *N. benthamiana* control plants (TRV-empty) and plants in which *SmD1* was  
745 silenced (TRV-*SlSmD1*). Galls were counted and root weight was measured two weeks after

746 inoculation with 200 *M. incognita* J2s per plant. Statistical significance was determined on the  
747 basis of three independent biological replicates, by Kruskal-Wallis tests. Clear significant  
748 differences were found between the TRV-GFP control and the TRV-SmD1 plants (\* $p \leq 0.05$ ;  
749 \*\* $p \leq 0.01$ ).

750

751 **Figure 6** *SmD1* plays an important role in the formation of giant cells. (a) The filiform  
752 J2s/swollen juveniles (Js) ratio obtained by fuchsine acid staining in the *N. benthamiana* root  
753 system with (TRV-SmD1) and without (TRV-empty) silencing with the TRV-SISmD1  
754 construct, following infection with *M. incognita*. (b) Galls of negative control plants and  
755 plants with SmD1 silencing collected two weeks post infection for measurement of the area  
756 of giant cells (dotted line) by the BABB clearing method (Cabrera et al., 2018). The biggest  
757 giant cell measured is shown by a surrounding dashed white line. Bar = 100  $\mu\text{m}$ . (c) Box-and-  
758 whisker plot of giant cell size ( $\mu\text{m}^2$ ) measurements (n = 32 and 26 galls).

759

## 760 **Supporting information**

761

762 **Figure S1** Identified EFF18 sequences in RKN species.

763 **Figure S2** EFF18 is a conserved RKN effector.

764 **Figure S3** Tomato phenotypes associated with VIGS of *SISmD1* genes.

765 **Figure S4** Semi-quantitative RT-PCR expression analysis of *NbSmD1s* in *N. benthamiana*  
766 roots VIGS experiments.

767 **Table S1** Sequences used in this study and accession numbers

768 **Table S2** Primers used in this study

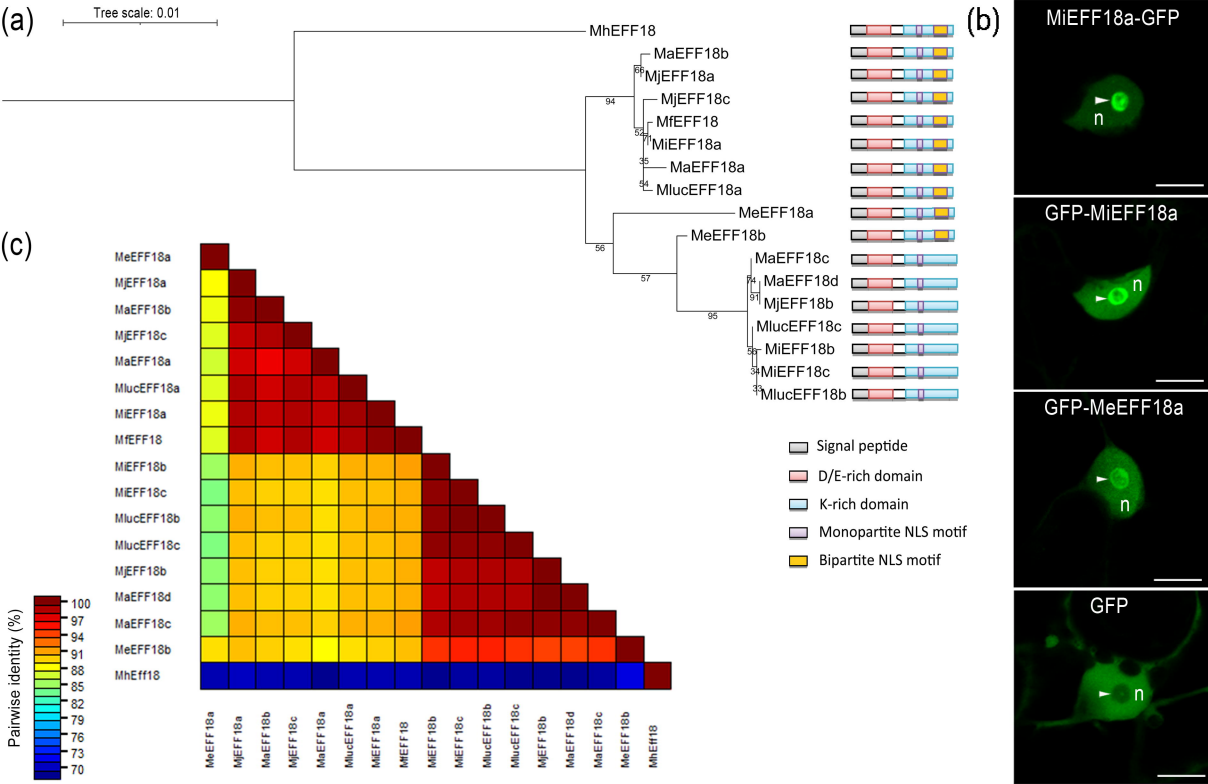



*M. incognita*

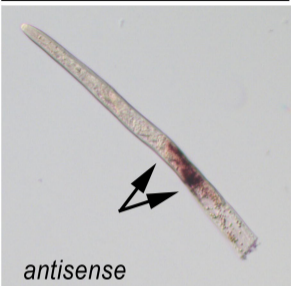

*M. arenaria*

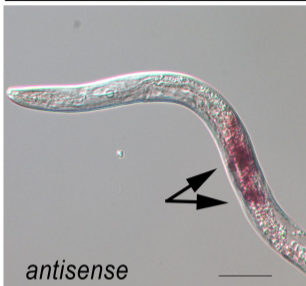

*M. enterolobii*

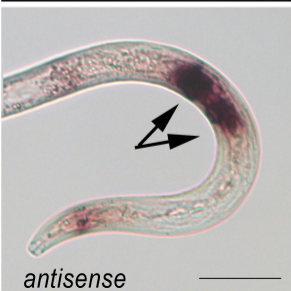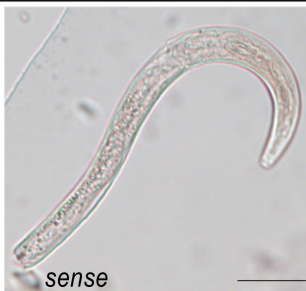

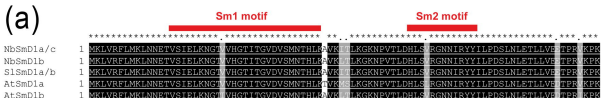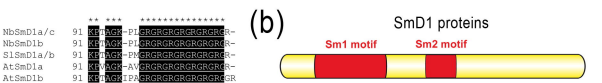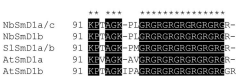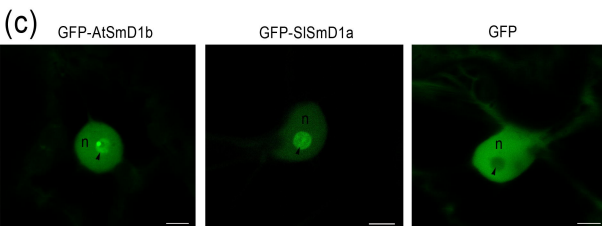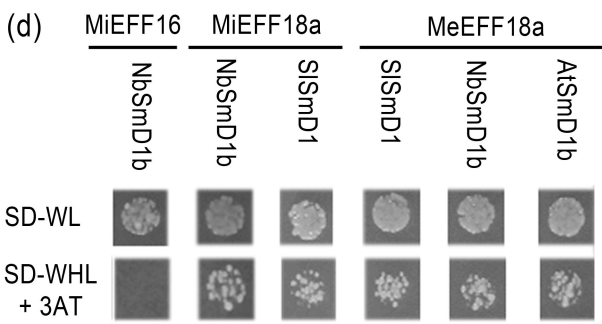

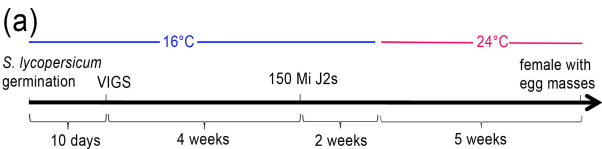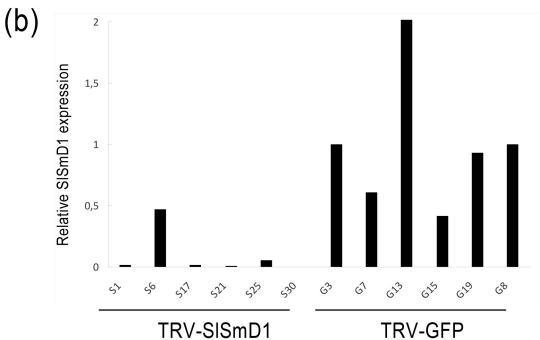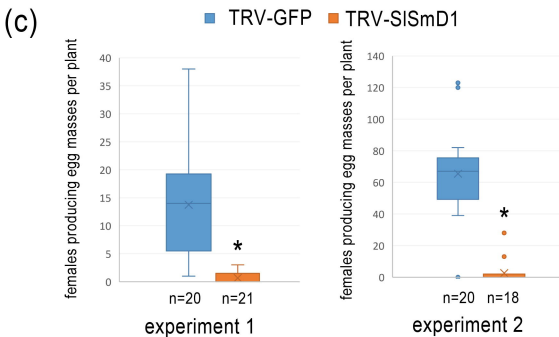

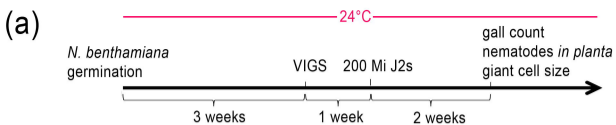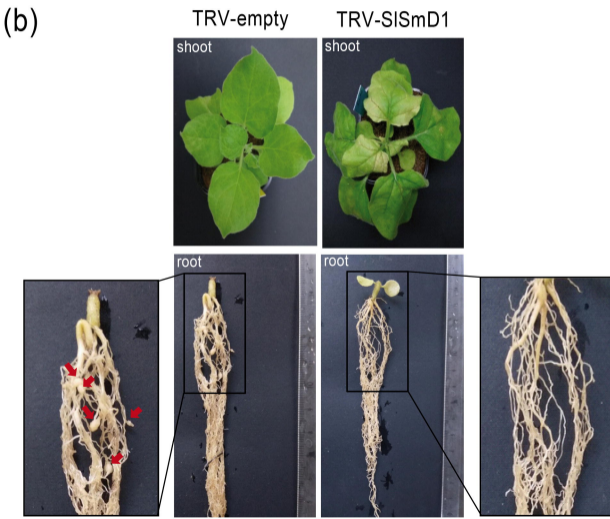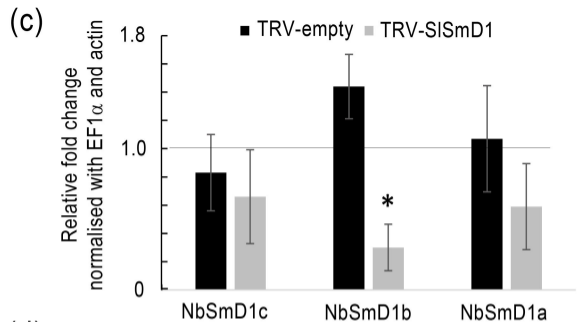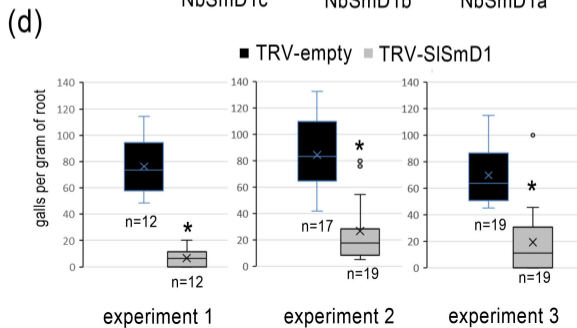

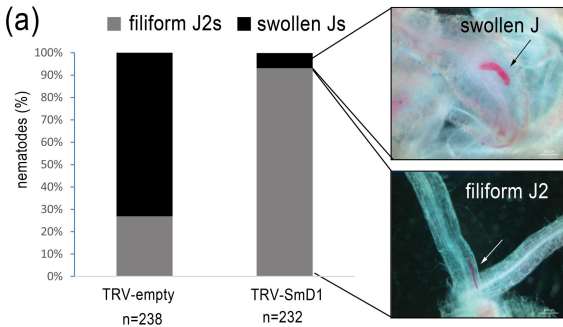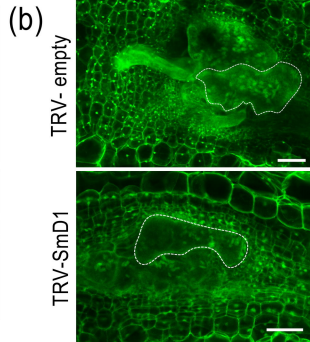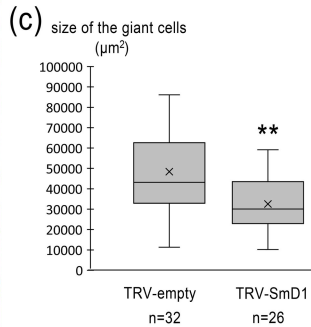

Source: https://biorxiv.org/content/10.1101/2020.11.25.398149v1.full.pdf
